CORRECTION

## Correction: PMA-qPCA: Accelerating the market release of high-quality *Bradyrhizobium diazoefficiens* inoculant

Mariana Cap, Camila Frydman, Antonella Galiñanes, Camila Aranguiz, Irina Faraco, Luisina Andriolo, Viviana Parreño, Marina Mozgovej

The method “PMA-qPCR” is misspelled in the article title. The correct title is: PMA-qPCR: Accelerating the market release of high-quality *Bradyrhizobium diazoefficiens* inoculant. The correct citation is: Cap M, Frydman C, Galiñanes A, Aranguiz C, Faraco I, Andriolo L, et al. (2025) PMA-qPCR: Accelerating the market release of high-quality *Bradyrhizobium diazoefficiens* inoculant. PLoS One 20(10): e0325878. <https://doi.org/10.1371/journal.pone.0325878>.

There is an error in the Funding statement. The correct Funding statement is as follows: This study was funded by private funds from Rizobacter S.A. and public funds from the research project 2023-PE-L04-I120 of the National Institute of Agricultural Technology.

### Reference

1. Cap M, Frydman C, Galiñanes A, Aranguiz C, Faraco I, Andriolo L, et al. PMA-qPCA: Accelerating the market release of high-quality *Bradyrhizobium diazoefficiens* inoculant. PLoS One. 2025;20(10):e0325878. <https://doi.org/10.1371/journal.pone.0325878> PMID: [41118351](https://pubmed.ncbi.nlm.nih.gov/41118351/)

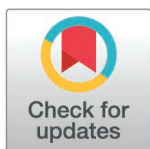

### OPEN ACCESS

**Citation:** Cap M, Frydman C, Galiñanes A, Aranguiz C, Faraco I, Andriolo L, et al. (2026) Correction: PMA-qPCA: Accelerating the market release of high-quality *Bradyrhizobium diazoefficiens* inoculant. PLoS One 21(2): e0343418. <https://doi.org/10.1371/journal.pone.0343418>

**Published:** February 18, 2026

**Copyright:** © 2026 Cap et al. This is an open access article distributed under the terms of the [Creative Commons Attribution License](https://creativecommons.org/licenses/by/4.0/), which permits unrestricted use, distribution, and reproduction in any medium, provided the original author and source are credited.
